## Correction

# Correction: Therapeutic effect of a novel Wnt pathway inhibitor on cardiac regeneration after myocardial infarction

Dezhong Yang, Wenbin Fu, Liangpeng Li, Xuwei Xia, Qiao Liao, Rongchuan Yue, Hongmei Chen, Xiongwen Chen, Songzhu An, Chunyu Zeng and Wei Eric Wang

*Clinical Science* (2017) **131**(24), 2919–2932; <https://doi.org/10.1042/CS20171256>

The details of the sources funding for the work presented in the published article were incorrect. The correct funding details are as follows:

This study was supported by grants from the National Natural Science Foundation of China [31730043; 81400256], and the Program of Innovative Research Team by National Natural Science Foundation [81721001]. Corrected online 8 January 2019.

Correction published:  
11 January 2019
